# Supplementary material for: Deubiquitinase USP20 promotes breast cancer metastasis by stabilizing SNAI2
Source: PubMed Central journal article supplement — Genes Dev. 2020 Oct 1;34(19-20):1310–5. doi: 10.1101/gad.339804.120 (PMC7528704; doi:10.1101/gad.339804.120), 2020-10-01
Supplement: supp_gad.339804.120_Supplemental_Information.pdf [file supp_gad.339804.120_Supplemental_Information.pdf]

## **Deubiquitinase USP20 promotes breast cancer metastasis by stabilizing SNAI2**

Wenyang Li, Minhong Shen, Yi-Zhou Jiang, Ruina Zhang, Hanqiu Zheng, Yong Wei,  
Zhi-Ming Shao, Yibin Kang

### **SUPPLEMENTAL INFORMATION**

- Supplemental materials and methods
- Four supplemental figures with legends
- Two supplemental tables

## **Supplemental Materials and Methods**

### **Sulforhodamine B (SRB) proliferation assay**

6 hours after transfected with non-targeting control, USP20 or SNAI2 siRNA, the cells were seeded to 96-well plates at  $1 \times 10^4$  cells per well. After culturing for different days as indicated, the cells were fixed with 10% trichloroacetic acid for 1 hour at 4°C, washed with ddH<sub>2</sub>O, and air dried overnight. SRB (Sigma, cat# 230162, 0.4% in 1% acetic acid) was used to stain cells for 20-30 min before washing with 1% acetic acid to remove unincorporated dye. Plates were air dried overnight, and then 10 mM Tris buffer was used to dissolve the dye. Absorbance at a wavelength of 540 nm was measured to indicate the total biomass after subtracting the background absorbance at 690 nm.

## Supplemental Figures

### A

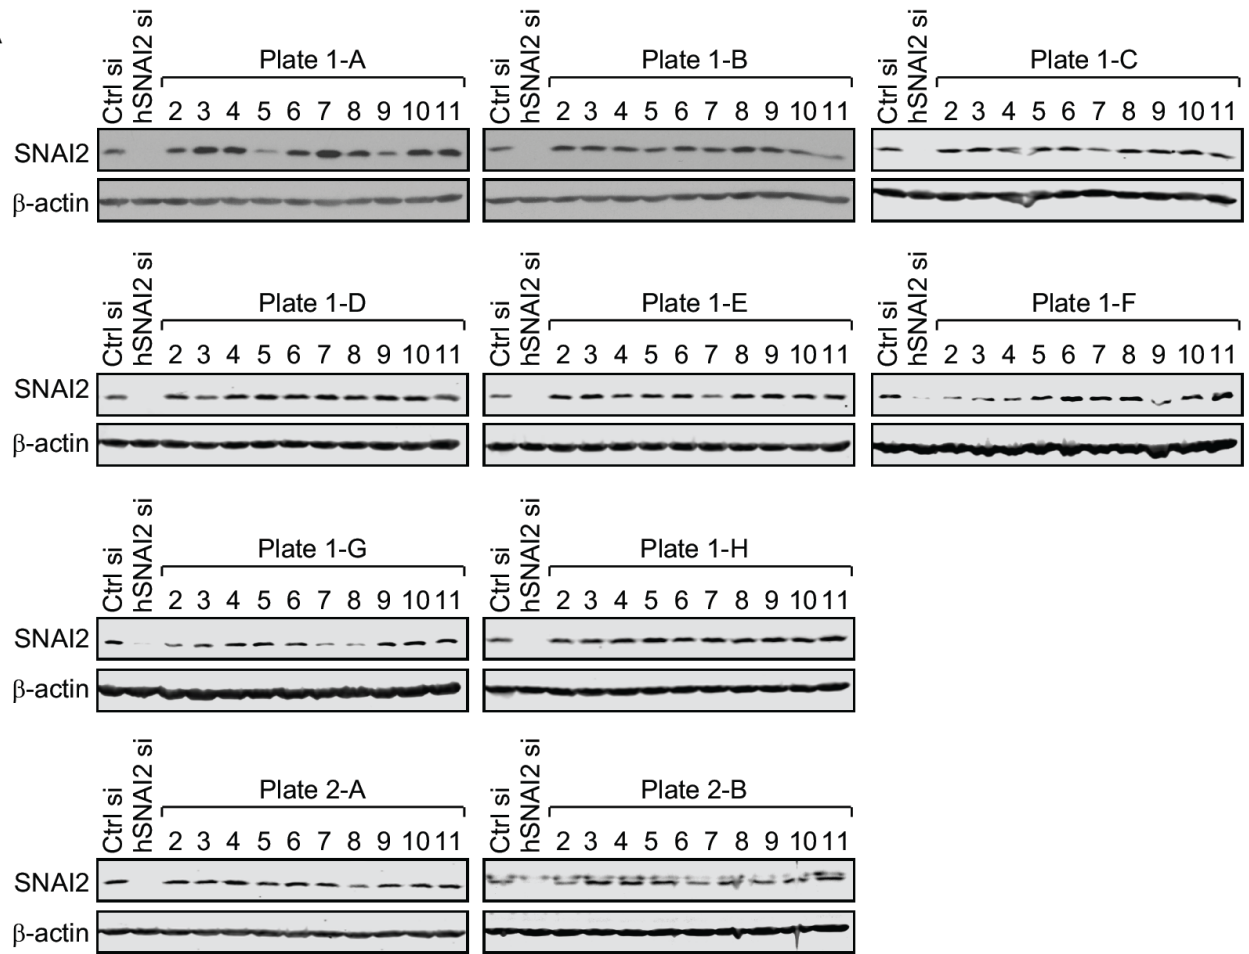

### B

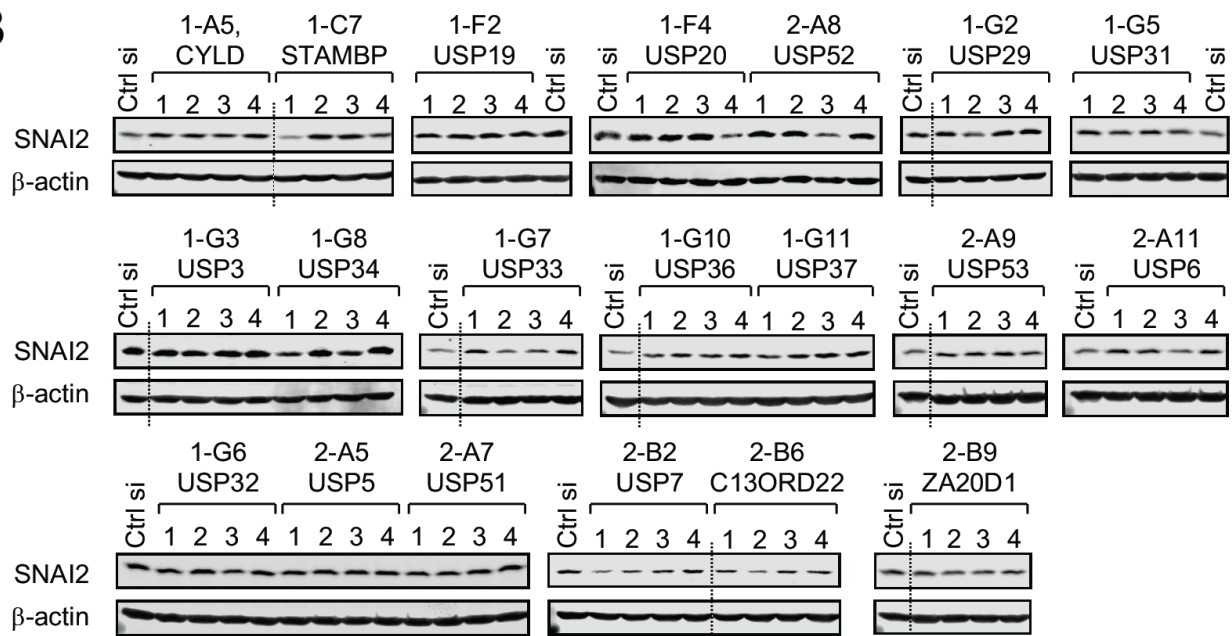

**C**

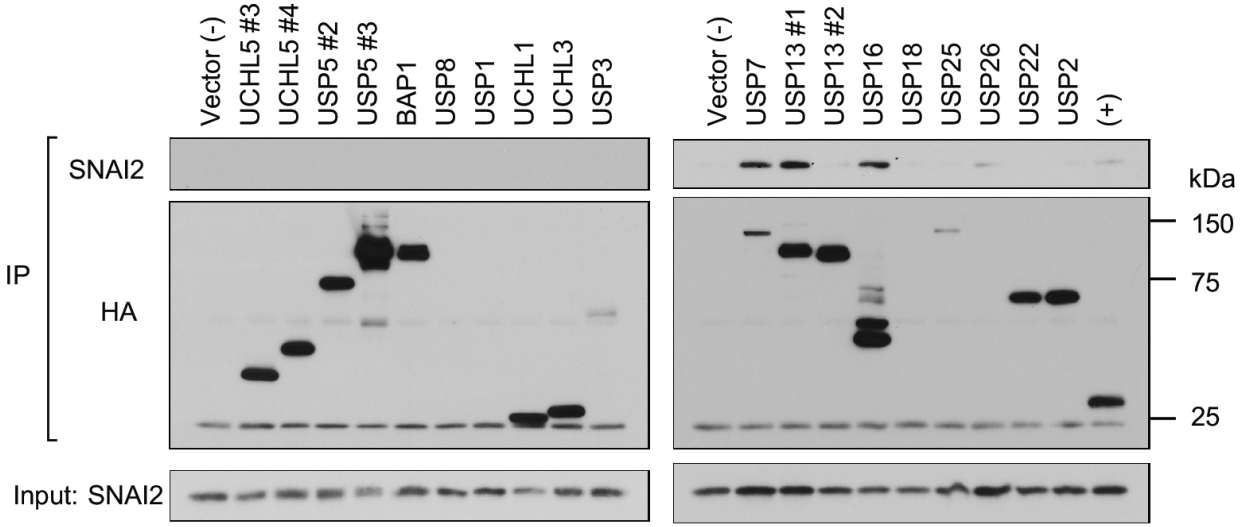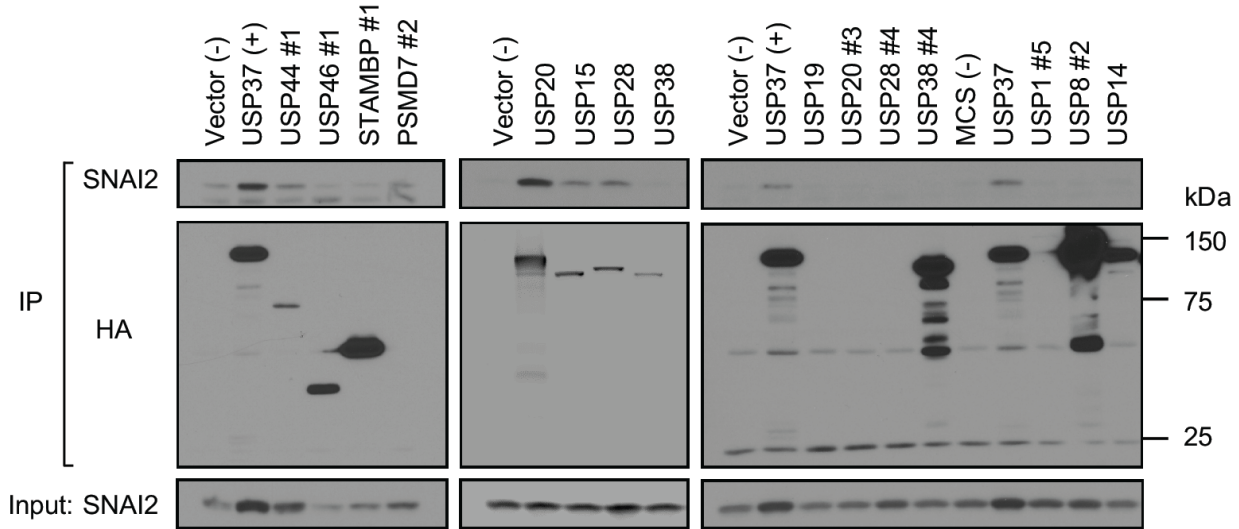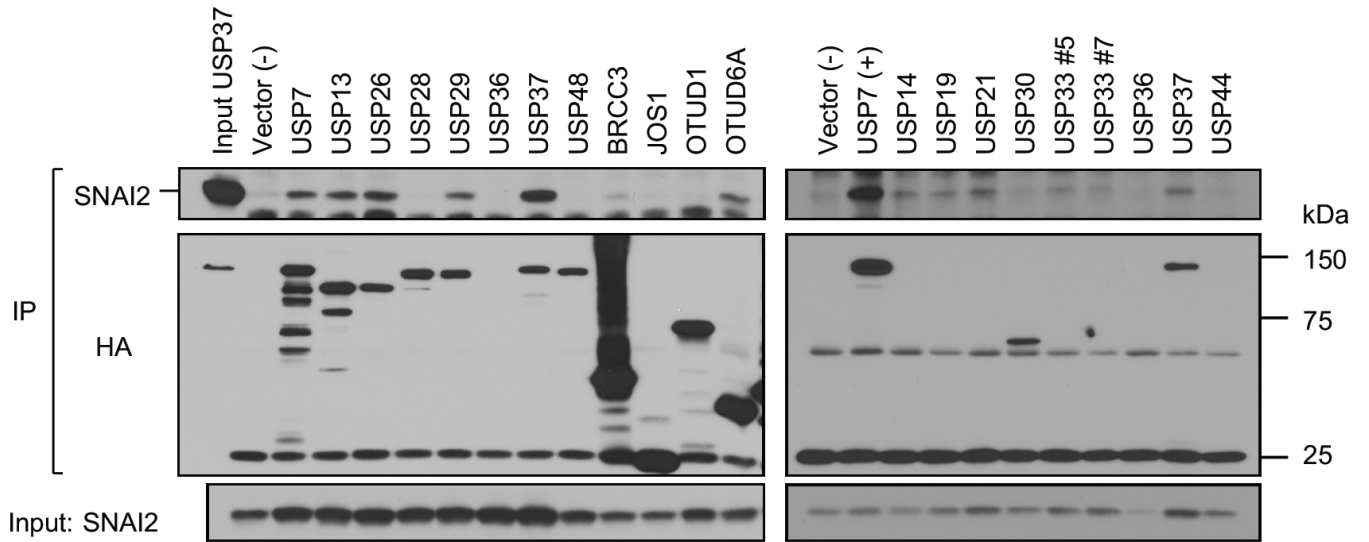

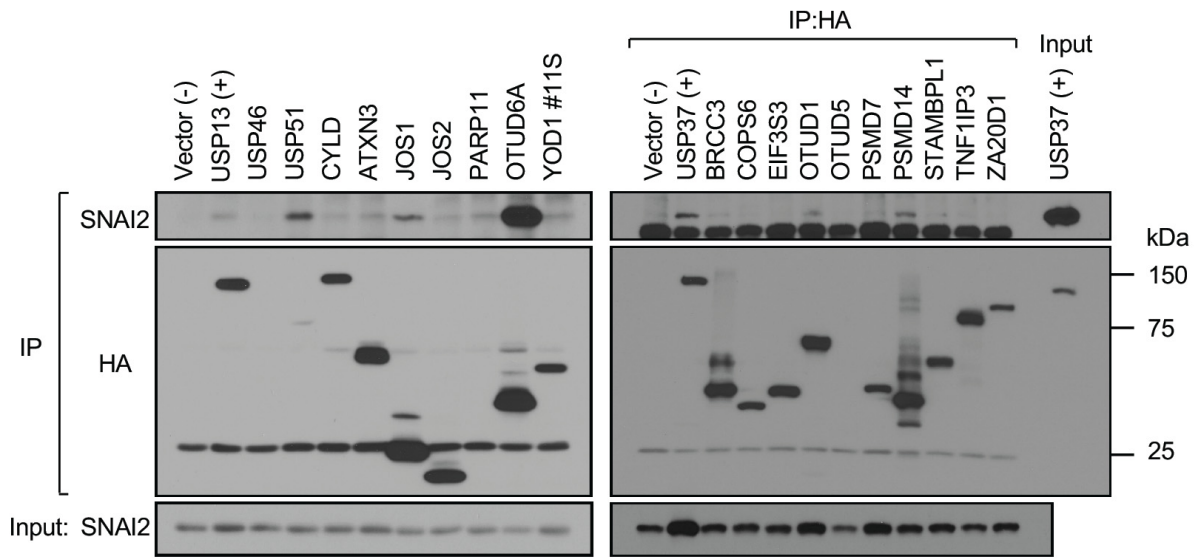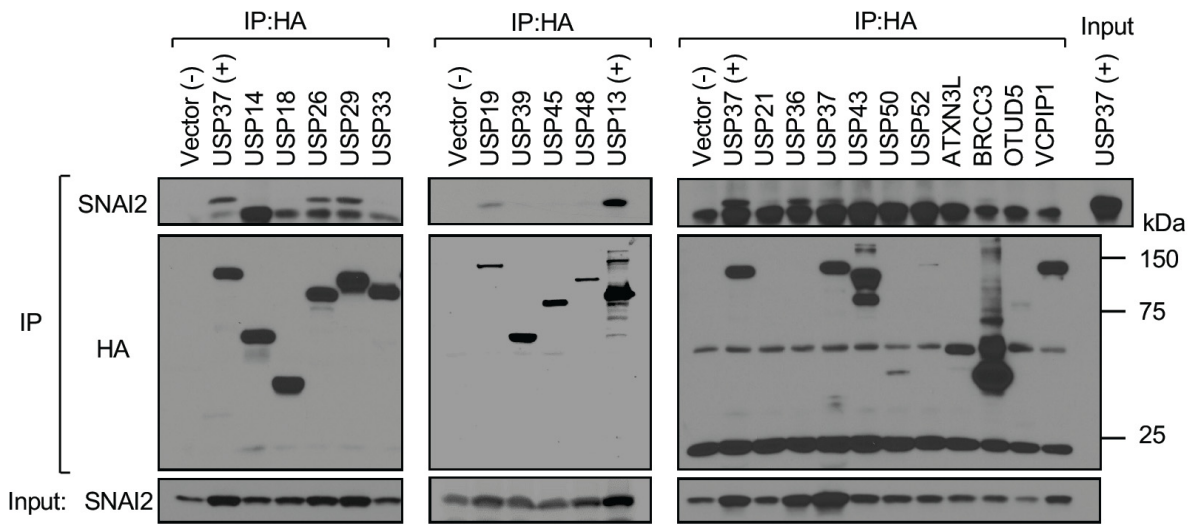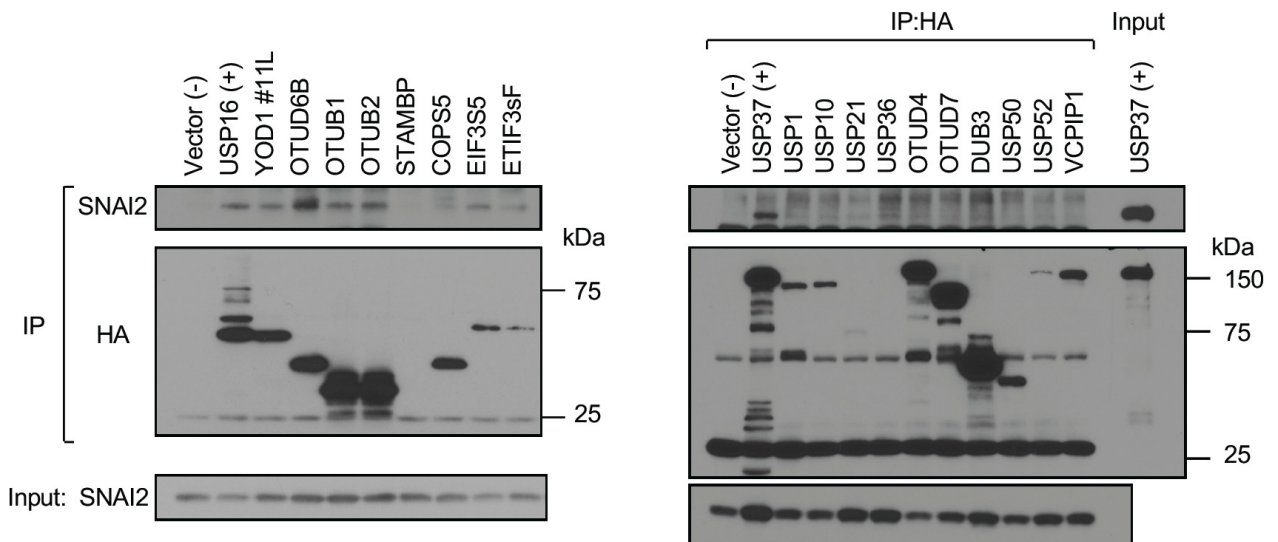

**Supplemental Figure S1. DUB siRNA library and cDNA library screening. (A)**

Western blot results of the siRNA library screening. Each of the DUBs was knocked down in MDA-MB-231 cells by pooled siRNAs, and SNAI2 level was determined by western blot at 48 hours after transfection. **(B)** Western blot results of the second-round siRNA library validation. Each of the DUBs was knocked down in MDA-MB-231 cells by four individual siRNAs, and SNAI2 level was determined by western blot at 48 hours after transfection. **(C)** Western blot results of the cDNA library co-IP screening. SNAI2 and different HA tagged DUB expression constructs were co-overexpressed in HEK293T cells. DUBs were pulled down from cell lysates using HA antibody. Co-IPed SNAI2 was detected by SNAI2 antibody.

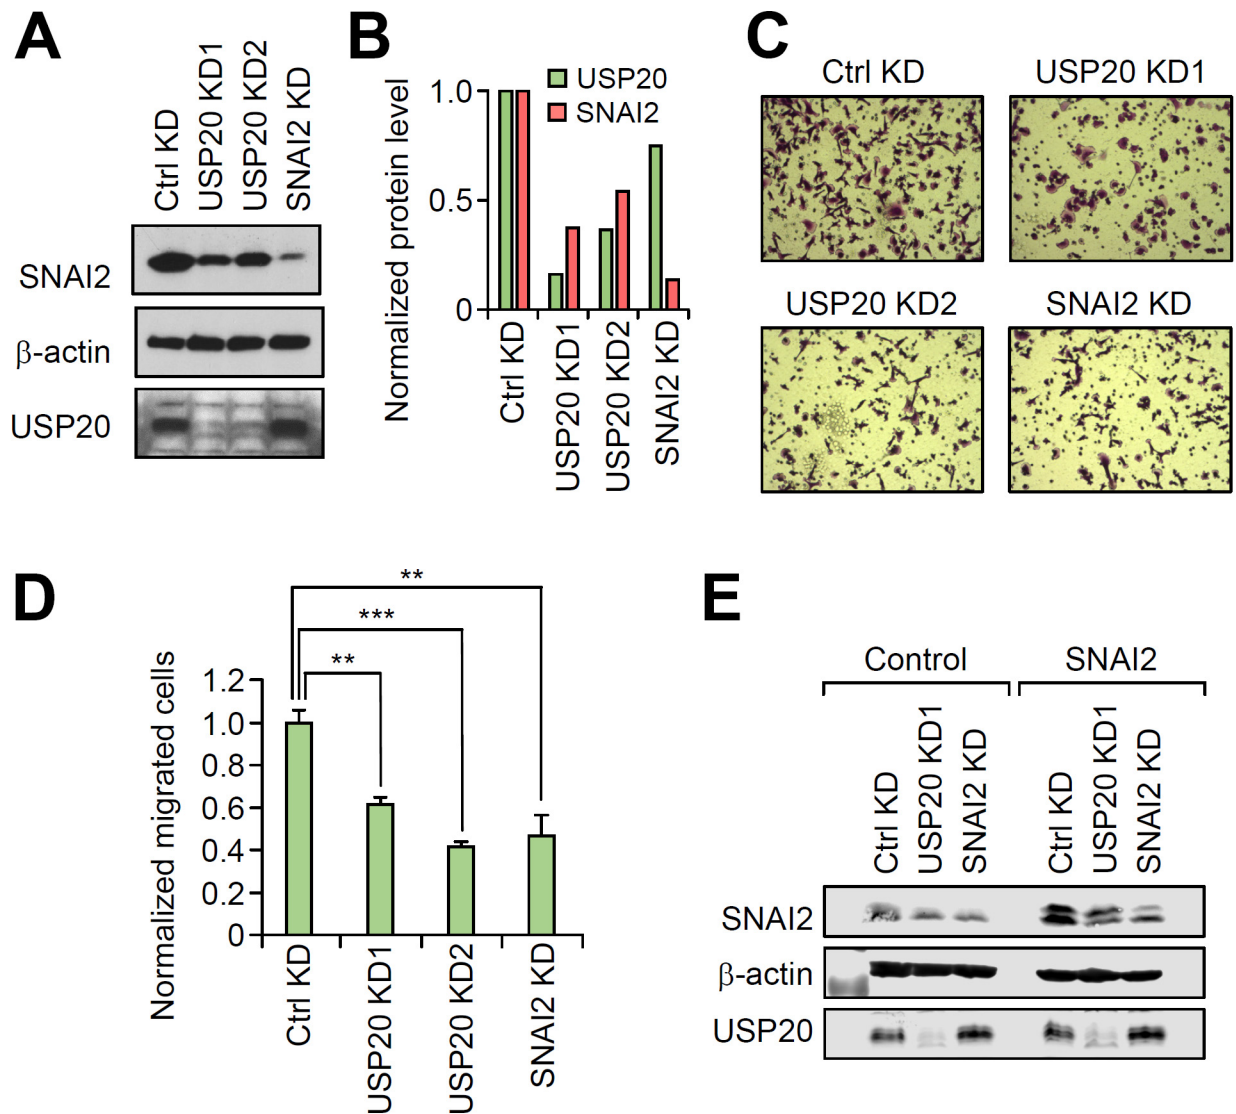

**Supplemental Figure S2. USP20 knockdown inhibits cell migration and invasion.**

**(A-B)** USP20 and SNAI2 were knocked down by siRNA in SUM159-M1a cells. 48 hours after transfection, cells were lysed for western blot. **(C-D)** USP20 and SNAI2 were knocked down by siRNA in SCP28 cells. 48 hours after transfection, cells were seeded for transwell migration assay. **(C)** Representative microscope images. **(D)** Quantified results. Data represent mean  $\pm$  SEM. \*\* $p < 0.01$ , \*\*\* $p < 0.001$  by one-tailed Student's *t* test. **(E)** USP20 and SNAI2 were knocked down by siRNA in control or SNAI2-overexpressing LM2 cells. 48 hours after transfection, cells were lysed for western blot.

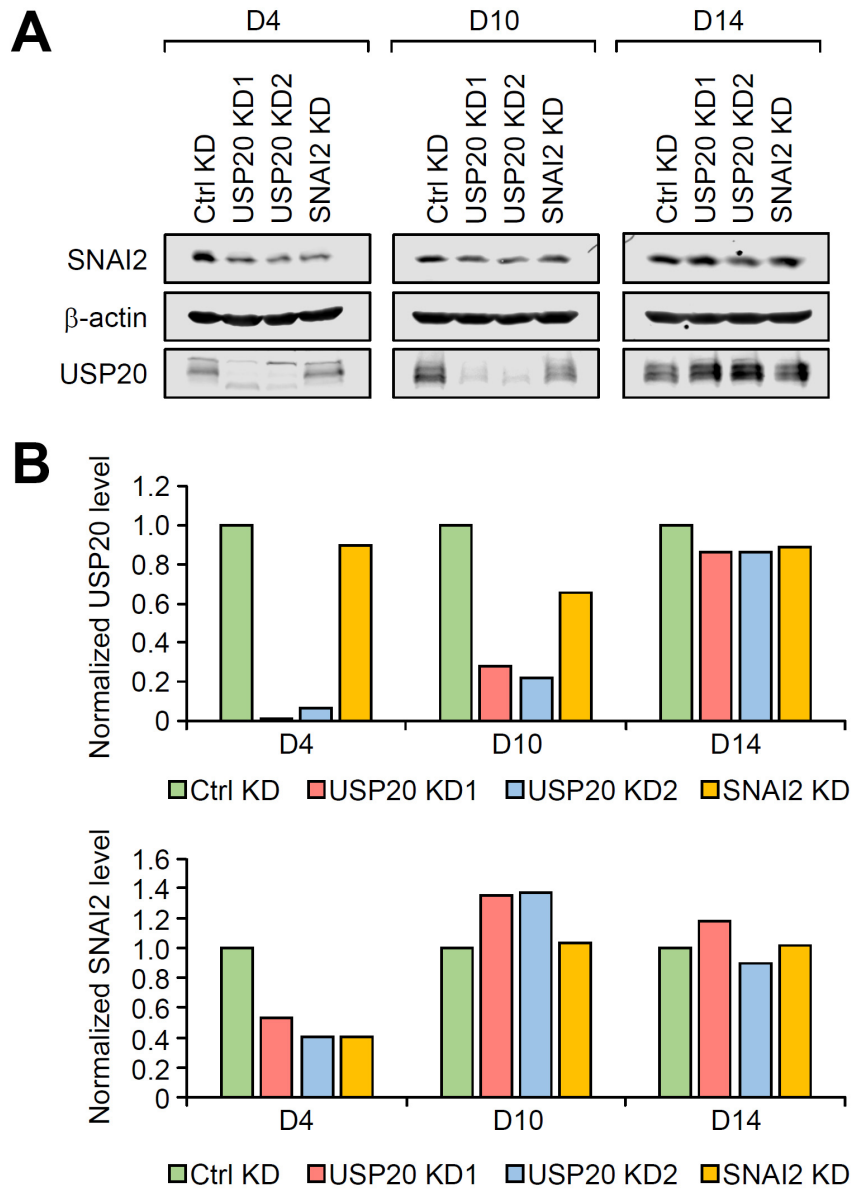

**Supplemental Figure S3. USP20 siRNA knockdown lasts for at least 10 days. (A)** Western blots of LM2 cells at 4, 10 or 14 days after transfection with USP20 or SNAI2 siRNAs. **(B)** Quantified results of the western blots.



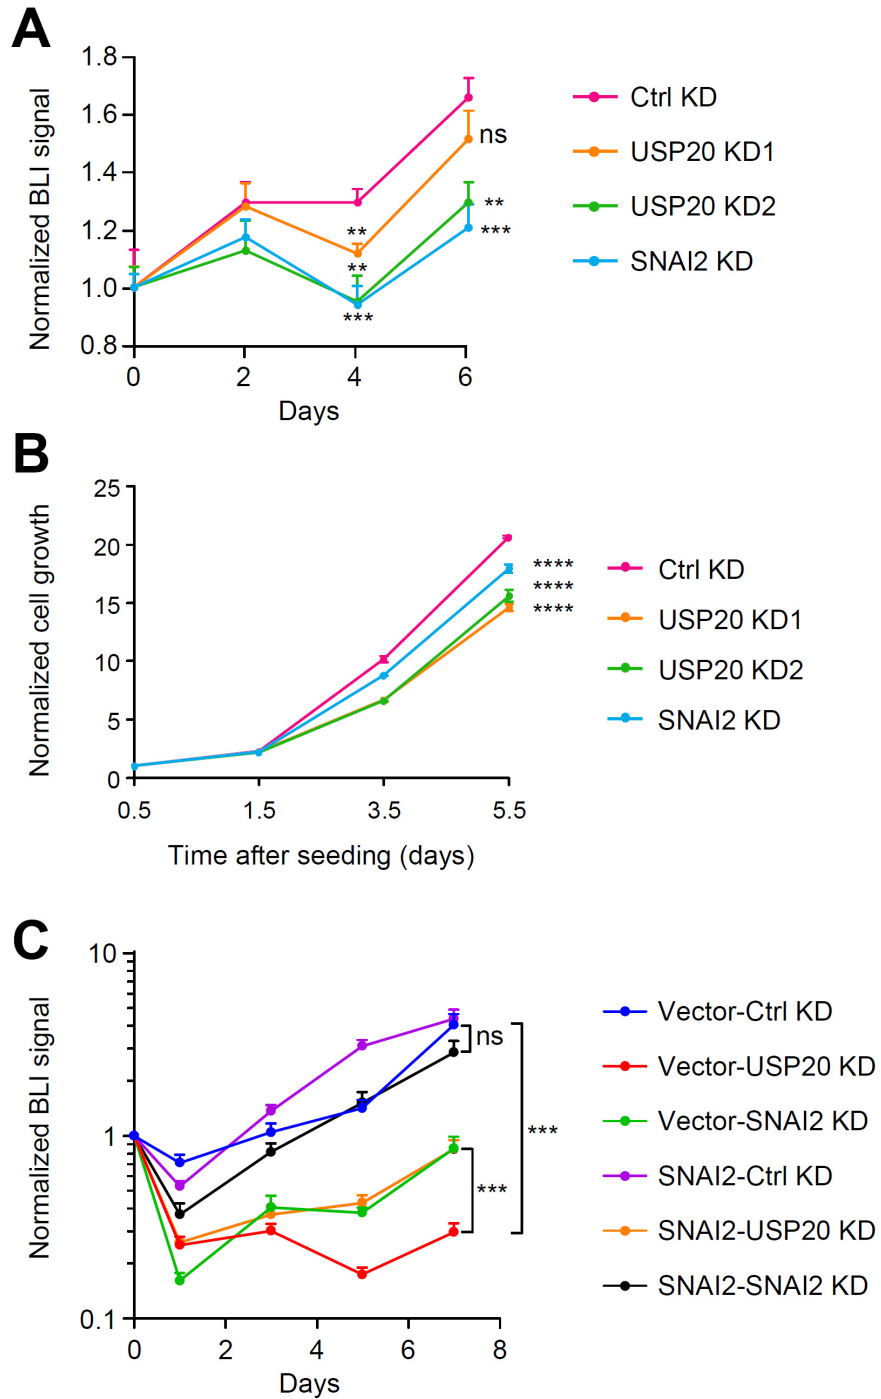

**Supplemental Figure S4. SNAI2 and USP20 knockdown reduce metastatic seeding in the lung. (A)** The seeding of LM2 cells in the lung was monitored by bioluminescence imaging (BLI) every other day and was normalized to day 0. Data represent mean  $\pm$  SEM. ns: non-significant, \*\* $p < 0.01$ , \*\*\* $p < 0.001$  by one-tailed Student's t test. **(B)** Proliferation assay of LM2 cells after siRNA-mediated knockdown

of USP20 or SNAI2. LM2 cells were transfected with non-targeting control siRNA or siRNAs targeting USP20 or SNAI2 and plated on 96 well plates 6 hours later at the same density. The cells were fixed at different time points as indicated in the figure, stained with sulphorhodamine B (SRB) to measure cell growth. Data represent mean  $\pm$  SEM. \*\*\*\* $p < 0.0001$  by two-tailed Student's t test. **(C)** Control LM2 cells and LM2 cells stably over-expressing SNAI2 were transfected with control siRNA, USP20 siRNA or SNAI2 siRNA. 48 hours after transfection, cells were collected, and 30,000 cells were injected into female NSG mice. BLI was performed and was normalized to day 0. Data represent mean  $\pm$  SEM. ns: non-significant, \* $p < 0.05$ , \*\* $p < 0.01$  by two-tailed Student's t test.

## **Supplemental Tables**

**Supplemental Table S1.** Summary of the quantified DUB siRNA library screening results.

**Supplemental Table S2.** Summary of the DUB cDNA library co-immunoprecipitation screening results.

**Supplemental Table S1. Summary of the quantified DUB siRNA library screening results**

1st Round siRNA library screening

| Plate | Well | Number       | Gene Name       | Normalized SNAI2 |
|-------|------|--------------|-----------------|------------------|
| 1-A   | 2    | 1            | <i>BAP1</i>     | 1.27             |
|       | 3    | 2            | <i>COP5</i>     | 2.58             |
|       | 4    | 3            | <i>CXORF53</i>  | 2.61             |
|       | 5    | 4            | <i>CYLD</i>     | 0.60             |
|       | 6    | 5            | <i>DUB1A</i>    | 2.11             |
|       | 7    | 6            | <i>DUB3</i>     | 3.40             |
|       | 8    | 7            | <i>FBX07</i>    | 2.37             |
|       | 9    | 8            | <i>FBX08</i>    | 0.92             |
|       | 10   | 9            | <i>FLJ14981</i> | 2.41             |
|       | 11   | 10           | <i>JOSD1</i>    | 2.16             |
| 1-B   | 2    | 11           | <i>MJD</i>      | 1.84             |
|       | 3    | 12           | <i>MYSM1</i>    | 1.89             |
|       | 4    | 13           | <i>OTUB1</i>    | 1.51             |
|       | 5    | 14           | <i>OTUB2</i>    | 1.31             |
|       | 6    | 15           | <i>OTUD1</i>    | 1.57             |
|       | 7    | 16           | <i>OTUD4</i>    | 1.25             |
|       | 8    | 17           | <i>OTUD5</i>    | 1.68             |
|       | 9    | 18           | <i>OTUD6B</i>   | 1.45             |
|       | 10   | 19           | <i>OTUD7</i>    | 1.01             |
|       | 11   | 20           | <i>ZA20D1</i>   | 0.67             |
| 1-C   | 2    | 21           | <i>PARP11</i>   | 1.38             |
|       | 3    | 22           | <i>PRPF8</i>    | 2.10             |
|       | 4    | 23           | <i>PSMD14</i>   | 1.12             |
|       | 5    | 24           | <i>SBB154</i>   | 1.35             |
|       | 6    | 25           | <i>SEN2</i>     | 1.47             |
|       | 7    | 26           | <i>STAMPB</i>   | 0.72             |
|       | 8    | 27           | <i>STAMBPL1</i> | 1.61             |
|       | 9    | 28           | <i>TNFAIP3</i>  | 1.40             |
|       | 10   | 29           | <i>UBL3</i>     | 1.81             |
|       | 11   | 30           | <i>UBL4</i>     | 1.06             |
| 1-D   | 2    | 31           | <i>UBL5</i>     | 1.33             |
|       | 3    | 32           | <i>UBR1</i>     | 0.98             |
|       | 4    | 33           | <i>UBTD1</i>    | 1.48             |
|       | 5    | 34           | <i>DC-UBP</i>   | 1.82             |
|       | 6    | 35           | <i>UCHL1</i>    | 1.49             |
|       | 7    | 36           | <i>UCHL3</i>    | 1.99             |
|       | 8    | 37           | <i>UCHL5</i>    | 1.36             |
|       | 9    | 38           | <i>UMPK</i>     | 1.63             |
|       | 10   | 39           | <i>UEVLD</i>    | 1.70             |
|       | 11   | 40           | <i>UFD1L</i>    | 0.95             |
| 1-E   | 2    | 41           | <i>USP1</i>     | 1.86             |
|       | 3    | 42           | <i>USP10</i>    | 2.06             |
|       | 4    | 43           | <i>USP11</i>    | 1.34             |
|       | 5    | 44           | <i>USP12</i>    | 1.67             |
|       | 6    | 45           | <i>USP13</i>    | 1.62             |
|       | 7    | 46           | <i>USP14</i>    | 1.07             |
|       | 8    | 47           | <i>USP15</i>    | 2.00             |
|       | 9    | 48           | <i>USP16</i>    | 2.34             |
| 10    | 49   | <i>USP17</i> | 2.23            |                  |
| 11    | 50   | <i>USP18</i> | 1.61            |                  |

2nd round siRNA library screening

| Plate      | Well    | Number | Gene Name       | Normalized SNAI2 |
|------------|---------|--------|-----------------|------------------|
| 1-A        | 5       | 1      | <i>CYLD</i>     | 1.10             |
| 1-C        | 7       | 3      | <i>STAMPB</i>   | 0.57             |
| 1-F        | 2       | 4      | <i>USP19</i>    | 0.91             |
| 1-F        | 4       | 5      | <i>USP20</i>    | 0.42             |
| 1-G        | 2       | 6      | <i>USP29</i>    | 0.53             |
| 1-G        | 3       | 7      | <i>USP3</i>     | 0.68             |
| 1-G        | 5       | 8      | <i>USP31</i>    | 1.25             |
| 1-G        | 6       | 9      | <i>USP32</i>    | 0.77             |
| 1-G        | 7       | 10     | <i>USP33</i>    | 0.59             |
| 1-G        | 8       | 11     | <i>USP34</i>    | 0.54             |
| 1-G        | 10      | 12     | <i>USP36</i>    | 1.11             |
| 1-G        | 11      | 13     | <i>USP37</i>    | 1.07             |
| 2-A        | 5       | 14     | <i>USP5</i>     | 1.02             |
| 2-A        | 7       | 15     | <i>USP51</i>    | 0.83             |
| 2-A        | 8       | 16     | <i>USP52</i>    | 0.47             |
| 2-A        | 9       | 17     | <i>USP53</i>    | 1.15             |
| 2-A        | 11      | 18     | <i>USP6</i>     | 0.88             |
| 2-B        | 2       | 19     | <i>USP7</i>     | 0.56             |
| 2-B        | 6       | 20     | <i>C13ORF22</i> | 0.55             |
| 1-B or 2-B | 11 or 9 | 2      | <i>ZA20D1</i>   | 0.99             |

|     |    |    |          |      |
|-----|----|----|----------|------|
| 1-F | 2  | 51 | USP19    | 0.81 |
|     | 3  | 52 | USP2     | 0.88 |
|     | 4  | 53 | USP20    | 0.73 |
|     | 5  | 54 | USP21    | 1.00 |
|     | 6  | 55 | USP22    | 1.46 |
|     | 7  | 56 | USP24    | 1.16 |
|     | 8  | 57 | USP25    | 1.26 |
|     | 9  | 58 | USP26    | 1.02 |
|     | 10 | 59 | USP27X   | 1.16 |
|     | 11 | 60 | USP28    | 1.31 |
| 1-G | 2  | 61 | USP29    | 0.74 |
|     | 3  | 62 | USP3     | 0.73 |
|     | 4  | 63 | USP30    | 0.89 |
|     | 5  | 64 | USP31    | 0.83 |
|     | 6  | 65 | USP32    | 0.74 |
|     | 7  | 66 | USP33    | 0.66 |
|     | 8  | 67 | USP34    | 0.56 |
|     | 9  | 68 | USP35    | 0.92 |
|     | 10 | 69 | USP36    | 0.82 |
|     | 11 | 70 | USP37    | 0.81 |
| 1-H | 2  | 71 | USP38    | 1.05 |
|     | 3  | 72 | USP39    | 1.31 |
|     | 4  | 73 | USP4     | 1.32 |
|     | 5  | 74 | USP40    | 1.79 |
|     | 6  | 75 | USP41    | 1.35 |
|     | 7  | 76 | USP42    | 1.59 |
|     | 8  | 77 | USP43    | 1.37 |
|     | 9  | 78 | USP44    | 1.71 |
|     | 10 | 79 | USP45    | 1.62 |
|     | 11 | 80 | USP46    | 1.91 |
| 2-A | 2  | 81 | USP47    | 1.15 |
|     | 3  | 82 | USP48    | 1.05 |
|     | 4  | 83 | USP49    | 1.28 |
|     | 5  | 84 | USP5     | 0.81 |
|     | 6  | 85 | USP50    | 1.11 |
|     | 7  | 86 | USP51    | 0.74 |
|     | 8  | 87 | USP52    | 0.49 |
|     | 9  | 88 | USP53    | 0.82 |
|     | 10 | 89 | USP54    | 0.87 |
|     | 11 | 90 | USP6     | 0.83 |
| 2-B | 2  | 91 | USP7     | 0.74 |
|     | 3  | 92 | USP8     | 1.93 |
|     | 4  | 93 | USP9X    | 1.61 |
|     | 5  | 94 | USP9Y    | 1.33 |
|     | 6  | 95 | C13ORF22 | 0.68 |
|     | 7  | 96 | VCPIP1   | 1.23 |
|     | 8  | 97 | YOD1     | 0.95 |
|     | 9  | 98 | ZA20D1   | 0.92 |
|     | 10 | 99 | ZRANB1   | 1.34 |

**Supplemental Table S2. Summary of the DUB cDNA library co-immunoprecipitation screening results.**

|    | Protein Name | Interaction with SNAI2 |
|----|--------------|------------------------|
| 1  | ATXN3        | No                     |
| 2  | ATXN3L       | No                     |
| 3  | BAP1         | No                     |
| 4  | BRCC3        | No                     |
| 5  | COPS5        | No                     |
| 6  | COPS6        | No                     |
| 7  | CYLD         | No                     |
| 8  | DUB3         | No                     |
| 9  | EIF3S3       | No                     |
| 10 | EIF3S5       | Yes                    |
| 11 | ETIF3sF      | Yes                    |
| 12 | JOS1         | Yes                    |
| 13 | JOS2         | No                     |
| 14 | OTUB1        | Yes                    |
| 15 | OTUB2        | Yes                    |
| 16 | OTUD1        | No                     |
| 17 | OTUD4        | No                     |
| 18 | OTUD5        | No                     |
| 19 | OTUD6A       | Yes                    |
| 20 | OTUD6B       | Yes                    |
| 21 | OTUD7B       | No                     |
| 22 | PSMD14       | Yes                    |
| 23 | PSMD7        | No                     |
| 24 | STAMPB       | No                     |
| 25 | STAMPBPL1    | No                     |
| 26 | TNFAIP3      | No                     |
| 27 | UBP33        | No                     |
| 28 | UBP38        | No                     |
| 29 | UBP46        | No                     |
| 30 | UCHL1        | No                     |
| 31 | UCHL3        | No                     |
| 32 | UCHL5        | No                     |
| 33 | USP1         | No                     |
| 34 | USP10        | No                     |
| 35 | USP13        | Yes                    |
| 36 | USP14        | No                     |
| 37 | USP15        | Yes                    |
| 38 | USP16        | Yes                    |
| 39 | USP18        | No                     |
| 40 | USP19        | No                     |
| 41 | USP2         | No                     |
| 42 | USP20        | Yes                    |
| 43 | USP21        | No                     |
| 44 | USP22        | No                     |
| 45 | USP25        | No                     |

|    |        |     |
|----|--------|-----|
| 46 | USP26  | Yes |
| 47 | USP28  | Yes |
| 48 | USP29  | Yes |
| 49 | USP3   | No  |
| 50 | USP30  | No  |
| 51 | USP37  | Yes |
| 52 | USP39  | No  |
| 53 | USP43  | No  |
| 54 | USP44  | Yes |
| 55 | USP45  | No  |
| 56 | USP48  | Yes |
| 57 | USP5   | No  |
| 58 | USP50  | No  |
| 59 | USP51  | No  |
| 60 | USP52  | No  |
| 61 | USP7   | Yes |
| 62 | USP8   | No  |
| 63 | VCPIP  | No  |
| 64 | YOD1   | Yes |
| 65 | ZA20D1 | No  |
